# Supplementary material for: A Disposable Saliva Electrochemical MIP-Based Biosensor for Detection of the Stress Biomarker α-Amylase in Point-of-Care Applications
Source: MDPI journal article supplement (doi:10.3390/electrochem2030028), 2021-07-26
Supplement: s1 [file s1]

Archive with 1 entries (1 files):
- electrochem-1280625-supplementary.pdf
